# Supplementary material for: Is There any Difference Between DSM-5 performance-only Specifier and Social Anxiety Disorder? Results from the Young-HUNT3 Study
Source: Springer Nature journal article supplement (doi:10.1007/s10862-023-10054-8), 2023-06-07
Supplement: MOESM1 [file 25462226]

**Data access**

The HUNT study invited those aged 13–100 years to participate in three surveys between 1994 and 2008, with the latest survey (HUNT 4) administered beginning in 2017. Comprehensive data have been collected from more than 125,000 individuals who have participated at least once, and biological materials have been collected from 78,000 of these participants. Data are stored in the HUNT databank, and biological material are stored in the HUNT biobank. The HUNT Research Centre has permission from the Norwegian Data Inspectorate to store and handle these data. The key identifier in these databases is the personal identification number given to all Norwegians at birth or immigration; deidentified data is sent to researchers upon approval of a research protocol by the Regional Ethical Committee and HUNT Research Centre. To protect participants’ privacy, the HUNT Research Centre aims to limit data storage outside the HUNT databank and cannot deposit data in open repositories. The HUNT databank maintains detailed records regarding all data exported for various projects, which staff can produce upon request. With HUNT Research Centre application approval, there are no restrictions on data export. For more information, see: https ://www.ntnu.edu/hunt/data.
